# Supplementary material
Source: publisher figshare collection journal article supplement (https://wiley.figshare.com/articles/dataset/_/3556608)
Supplement: Supplementary file 2 [file 1 › appendix-A.htm]

Ecological Archives E094-107-A1


*Ecological Archives* E094-107-A1

Masatoshi Sugeno, Stephan B Munch. 2013. A semiparametric Bayesian method for detecting Allee effects. *Ecology* 94:1196–1204. http://dx.doi.org/10.1890/12-0454.1

Appendix A. Allee threshold for populations with age structure.

> View / download PDF.


---

[Back to E094-107]
